# Supplementary material for: Cannabis use prevalence among Baby Boomers before and after implementation of recreational retail sales in California
Source: Springer Nature journal article supplement (doi:10.1186/s13011-022-00443-9), 2022-03-05
Supplement: MOESM1 [file 20195242]

# **Cannabis use prevalence among Baby Boomers before and after implementation of recreational retail sales in California**

Supplement

California Health Interview Survey questions

Source: California Health Interview Survey

The next questions are about marijuana also called cannabis or weed, hashish, and other products containing THC. There are many methods for consuming these products, such as smoking, vaporizing, dabbing, eating, or drinking.

Have you ever, even once, tried marijuana or hashish in any form?

[IF NEEDED: THC is the active ingredient in marijuana.]

01 YES

02 NO

-7 REFUSED

-8 DON'T KNOW

How long has it been since you last used marijuana or hashish in any form?

01 DAYS [HR: 0-365]

02 MONTHS [HR: 0-12]

03 YEARS [0-99]

-7 REFUSED

-8 DON'T KNOW

During the past 30 days, on how many days did you use marijuana, hashish, or another THC product?

01 0 DAYS

02 1-2 DAYS

03 3-5 DAYS

04 6-9 DAYS

- 05 10-19 DAYS
- 06 20-29 DAYS
- 07 30 DAYS OR MORE
- 7 REFUSED
- 8 DON'T KNOW

What is your date of birth?

[AA1MON] -

MONTH \_\_\_\_\_ [RANGE: 1-12]

- 01 JANUARY
- 02 FEBRUARY
- 03 MARCH
- 04 APRIL
- 05 MAY
- 06 JUNE
- 07 JULY
- 08 AUGUST
- 09 SEPTEMBER
- 10 OCTOBER
- 11 NOVEMBER
- 12 DECEMBER

[AA1DAY] -

DAY \_\_\_\_\_ [RANGE: 1-31]

[AA1YR] -

YEAR \_\_\_\_\_ [RANGE: 1907-2001]

- 7 REFUSED
- 8 DON'T KNOW

Are you male or female?

- 01 MALE
- 02 FEMALE
- 7 REFUSED

Are you Latino or Hispanic?

01 YES

02 NO

-7 REFUSED

-8 DON'T KNOW

which one or more of the following you would use to describe yourself. Would you describe yourself as Native Hawaiian, Other Pacific Islander, American Indian, Alaska Native, Asian, Black, African American, or White?

[IF R SAYS "NATIVE AMERICAN" CODE AS "4"] [IF R GIVES ANOTHER RESPONSE YOU MUST SPECIFY WHAT IT IS]

[CODE ALL THAT APPLY]

01 WHITE

02 BLACK OR AFRICAN AMERICAN

03 ASIAN

04 AMERICAN INDIAN OR ALASKA NATIVE

05 OTHER PACIFIC ISLANDER

06 NATIVE HAWAIIAN

-7 REFUSED

-8 DON'T KNOW

91 OTHER (SPECIFY: \_\_\_\_\_)

What is the highest grade of education you have completed and received credit for?

30 NO FORMAL EDUCATION

02 GRADE SCHOOL

03 HIGH SCHOOL OR EQUIVALENT

04 4-YEAR COLLEGE OR UNIVERSITY

05 GRADUATE OR PROFESSIONAL SCHOOL

06 2-YEAR JUNIOR OR COMMUNITY COLLEGE

07 VOCATIONAL, BUSINESS, OR TRADE SCHOOL

-7 REFUSED

-8 DON'T KNOW (OUT OF RANGE)

What is your best estimate of your household's total annual income from all sources before taxes in 2017?

[IF NEEDED, SAY: "Include money from jobs, social security, retirement income, unemployment payments, public assistance and so forth. Also include income from interest, dividends, net income from business, farm, or rent and any other money income."]

[IF AMOUNT GREATER THAN \$999,995, ENTER "999,995"]

\$\_\_\_\_\_ AMOUNT [HR: 0-999995]

-7 REFUSED

-8 DON'T KNOW

Has a doctor ever told you that you have asthma?

01 YES

02 NO

-7 REFUSED

-8 DON'T KNOW

Which of the following were you doing last week?

01 Working at a job or business,

02 With a job or business but not at work,

03 Looking for work, or

04 Not working at a job or business?

-7 REFUSED

-8 DON'T KNOW

What is the main reason you did not work last week?

[IF NEEDED, SAY: "Main reason is the most important reason."]

01 TAKING CARE OF HOUSE OR FAMILY

02 ON PLANNED VACATION

03 COULDN'T FIND A JOB

04 GOING TO SCHOOL/STUDENT

05 RETIRED

06 DISABLED

07 UNABLE TO WORK TEMPORARILY

08 ON LAYOFF OR STRIKE

09 ON FAMILY OR MATERNITY LEAVE

10 OFF SEASON

11 SICK

91 OTHER

-7 REFUSED

-8 DON'T KNOW

Altogether, have you smoked at least 100 or more cigarettes in your entire lifetime?

01 YES

02 NO

-7 REFUSED

-8 DON'T KNOW

These next questions are about your height and weight. How tall are you without shoes?

[IF NEEDED, SAY: "About how tall?"]

\_\_\_\_\_ FEET

\_\_\_\_\_ INCHES

\_\_\_\_\_ METERS

\_\_\_\_\_ CENTIMETERS

-7 REFUSED

-8 DON'T KNOW

{When not pregnant, how/How} much do you weigh without shoes?

[IF NEEDED, SAY: "About how much?"]

\_\_\_\_\_ POUNDS

\_\_\_\_\_ KILOGRAMS

-7 REFUSED

-8 DON'T KNOW

About how often during the past 30 days did you feel nervous—Would you say all of the time, most of the time, some of the time, a little of the time, or none of the time?

01 ALL

02 MOST

03 SOME

04 A LITTLE

05 NONE / NEVER

-7 REFUSED

-8 DON'T KNOW

How often did you feel so depressed that nothing could cheer you up?

[IF NEEDED, SAY: "All of the time, most of the time, some of the time, a little of the time, or none of the time?"]

01 ALL

02 MOST

03 SOME

04 A LITTLE

05 NONE / NEVER

-7 REFUSED

-8 DON'T KNOW
